# Supplementary material
Source: publisher figshare collection journal article supplement (https://sage.figshare.com/ndownloader/files/13262198)
Supplement: Supplementary file 1 [file 13262198]

## Sheet: S. table4 Top IPA can. pathway
Actin Cytoskeleton Signaling network	earlyFC	lateFC		Cyclins and Cell Cycle Regulation network	earlyFC	lateFC		Estrogen-mediated S-phase Entry network	earlyFC	lateFC		Gα12/13 Signaling network	earlyFC	lateFC		Interferon Signaling network	earlyFC	lateFC		NRF2-mediated Oxidative Stress Response network	earlyFC	lateFC		Prolactin Signaling network	earlyFC	lateFC		RhoA Signaling network	earlyFC	lateFC		Sumoylation Pathway network	earlyFC	lateFC		JAK/Stat Signaling network	earlyFC	lateFC		4 common elements in " Interferon Sig." and " JAK/Stat Sig.":		16 common elements in " Prolactin Sig." and " JAK/Stat Sig.":
PDGFB	N/A	341.2489503877197		CCND2	N/A	13.200145206073236		CDKN1A	3.5697540942819685	N/A		F2RL1	-6.049817617	35.30391382133852		IFI35	4.980564112188586	N/A		MAP3K5	15.516677718437839	-2.071127352406302		Prolactin	1151.504499479928	29.055522150232097		PLD1	6.071604849284794	N/A		MAPK10	20.41964409095729	-2.4753293418838327		PIK3R3	6.657902160786359	N/A		STAT2		PIK3R3
PDGFD	68.40958084900956	3.30552505430651		TGFB2	N/A	10.531696850405861		DP1	-2.100338884	N/A		MAPK10	20.41964409095729	-2.4753293418838327		TAP1	7.233486065053025	-2.794740289089819		DNAJC6	3.329807982925436	6.111563827924068		PRLR	N/A	9.15471201042101		LPAR6	4.857884785433843	N/A		DIRAS3	N/A	14.964229257771319		IRS2	4.810225779203974	N/A		JAK2		IRS2
IQGAP2	18.910152108228502	3.39197255785024		p15				c-MYC	N/A	-2.5816993694932275		ASK1	15.516677718437839	-2.071127352406302		IFI6	6.425659528613456	-2.208238627069023		PIK3R3	6.657902160786359	N/A		PIK3R3	6.657902160786359	N/A		SEMA3F	N/A	4.23921668692592		MAP3K5	15.516677718437839	-2.071127352406302		PIK3C2B	4.097262902455594	N/A		STAT1		PIK3C2B
FGF7	10.410294893141327	N/A		INK4B	2.89282277305973	3.4193500443251366		CDK2	-3.109481949	N/A		F2RL2	2.95304831645381	4.072733595612406		IFNGR2	3.40450889234157	N/A		EPHX1	5.921679875662076	N/A		IRS2	4.810225779203974	N/A		2005-09-01	3.166313672831194	N/A		ISG20	18.680634708999996	-7.233029489665641		CEBPB	3.9043820840767536	N/A		SOCS1		CEBPB
FGF9	4.509382363343353	4.861795112809332		PPP2R1B	5.893208058058392	N/A		SKP2	N/A	-4.353833331386971		PIK3R3	6.657902160786359	N/A		STAT2	2.915090906645001	N/A		IRS2	4.810225779203974	N/A		PIK3C2B	4.097262902455594	N/A		PLEKHG5	2.3311585061273457	N/A		RHOU	7.56184134757905	N/A		CDKN1A	3.5697540942819685	N/A				STAT5A
PIK3R3	6.657902160786359	N/A		HDAC4	4.552214105705149	N/A		CyclinD1	-5.007760481	N/A		LPAR6	4.857884785433843	N/A		IFNγRα	2.7728786295047545	N/A		DNAJB9	2.0919712720241797	2.5667497371663757		CEBPB	3.9043820840767536	N/A		LPAR2	N/A	2.3254645974832067		DAXX	5.677145257072562	N/A		STAT5A	5.657112467380681	-2.552141877495909				RRAS2
IRS2	4.810225779203974	N/A		PPM1L	N/A	3.811285224010816		RBL1	-5.102510192	-2.130285976862895		IRS2	4.810225779203974	N/A		IFITM3	2.724512084353584	N/A		FKBP5	6.962973752383027	-2.36217068925682		STAT5A	5.657112467380681	-2.552141877495909		MYL5	2.2123577087898574	N/A		RHOB	3.566114487244979	N/A		PIAS3	3.0940934070777684	N/A				IRS1
PIK3C2B	4.097262902455594	N/A		p21CIP1	3.5697540942819685	N/A		CCNA2	-5.483726175	-3.594913231909062		PIK3C2B	4.097262902455594	N/A		IRF9	2.3741110406140837	N/A		FTL	7.840606744415482	-3.3363839980577046		RRAS2	2.948565136563552	N/A		PPP1R12B	2.1162293671284815	N/A		RHOF	2.855024717574744	N/A		RRAS2	2.948565136563552	N/A				GAB1
F2R	N/A	3.8558465858328015		HDAC11	5.099818254210074	-2.1430695139134643		CDC25A	-11.18428745	N/A		F2R	N/A	3.8558465858328015		IFITM1	2.2061948492925536	N/A		MGST2	4.200531743085141	N/A		IRS1	2.6991296883113267	N/A		PTK2B	2.0277635068027386	N/A		RHOD	2.5554922230194164	N/A		STAT2	2.915090906645001	N/A				STAT3
CYFIP2	3.2917949323659226	N/A		ABL1	2.3229108552987126	N/A		CDC2	-19.57181908	-5.119423291808494		RRAS2	2.948565136563552	N/A		IFITM2	2.0114538071878574	N/A		PIK3C2B	4.097262902455594	N/A		PRKCH	2.6354895957457916	N/A		LPAR1	4.4295536208346515	-3.4784612211892956		Cbx4	2.263437660247613	N/A		IRS1	2.6991296883113267	N/A				STAT5B
ARHGEF6	3.1294138032155554	N/A		HDAC10	2.2691002731995873	N/A		E2F1	-28.03726552	N/A		IRS1	2.6991296883113267	N/A		JAK2	2.583965692158352	-2.5418925314480365		NRPB	N/A	3.5416551496182933		GAB1	2.506944754094515	N/A		2006-09-01	2.135743642798489	-2.123653805398678		MAPK8	N/A	2.091246791692101		Gαq	N/A	2.5098798394568314				JAK2
RRAS2	2.948565136563552	N/A		HDAC9	-4.442242108	2.57438243721705		E2F7	-40.32346858	N/A		GAB1	2.506944754094515	N/A		STAT1	1.758931458	-1.749870234		MGST1	3.481717671743239	N/A		STAT3	2.328224464730205	N/A		PPP1CB	2.207645280877293	-2.3166026040051864		Dnmt3A	2.0751803799963064	N/A		GAB1	2.506944754094515	N/A				STAT1
IRS1	2.6991296883113267	N/A		p16INK4A	-2.060611867	N/A		CCNE2	-132.9368453	N/A		LPAR2	N/A	2.3254645974832067		SOCS1	2.4050631141510155	-2.5950347648774943		SOD3	3.3880032473322124	N/A		FYN	3.728769051218051	-2.0597799596299304		DLC1	-2.677792176	2.2375743155467243		FAS	2.070843160444187	N/A		STAT3	2.328224464730205	N/A				SOCS1
GAB1	2.506944754094515	N/A		DP1	-2.100338884	N/A		E2F8	-259.2268582	N/A		ELK-1	N/A	2.3235900360498336		MX1	5.255681795800832	-6.315906087089878		SQSTM1	3.3467696972869327	N/A		STAT5B	2.7249018205312145	-2.065791599307691		ACTR2	-2.032645394	N/A		RHOQ	2.6612040147556373	-2.2669273895930315		STAT5B	2.7249018205312145	-2.065791599307691				HRAS
RAC3	2.276105604955521	N/A		PPP2R5A	N/A	-2.1013147168788366		E2F2	-465.262386	N/A		MYL5	2.2123577087898574	N/A		IFIT3	N/A	-3.0676560255425067		FTH1	3.3385629311249208	N/A		JAK2	2.583965692158352	-2.5418925314480365		NRP2	-2.118695034	N/A		IκBα	2.4057269657595013	-3.5445648515991275		JAK2	2.583965692158352	-2.5418925314480365				PIK3R1
SSH3	2.2249145216676536	N/A		p19INK4D	-2.387124828	N/A						MAPK8	N/A	2.091246791692101		BCL-2	-4.386872835	N/A		TXNRD1	3.0108159655533537	N/A		STAT1	1.758931458	-1.749870234		RHOA	-2.137561955	N/A		Ran	-2.022944292	N/A		STAT1	1.758931458	-1.749870234				SOCS3
MYL5	2.2123577087898574	N/A		CDK2	-3.109481949	N/A						MAPK7	2.028252089140314	N/A		IFIT1	-2.310519601	-12.635508099281473		GSR	2.9980281768920554	N/A		SOCS1	2.4050631141510155	-2.5950347648774943		ARPC5L	-2.182006772	N/A		ARHGDIA	-2.040617096	N/A		SOCS1	2.4050631141510155	-2.5950347648774943
PPP1R12B	2.1162293671284815	N/A		PA2G4	-3.163455819	N/A						PYK2	2.0277635068027386	N/A						RRAS2	2.948565136563552	N/A		TCF7	-4.733800437	3.7404307353588337		RAPGEF6	N/A	-2.1835935409430767		TDG	-2.091757622	N/A		STAT4	2.785610070868761	-3.551256341390211
PPP1CB	2.207645280877293	-2.3166026040051864		CDK6	-3.174862131	N/A						LPAR1	4.4295536208346515	-3.4784612211892956						MAFK	N/A	2.7550157999490037		HRAS	-2.345025264	N/A		NEDD4	-2.19574037	N/A		Sae2	-2.120751804	N/A		STAT6	2.3688237579892037	-3.9503808302795815
ITGA2	-2.843858211	2.6466943210678715		PPP2R3A	-4.186091211	N/A						CDH13	2.118113846992106	-2.847496509926151						IRS1	2.6991296883113267	N/A		PRKCD	N/A	-2.5263338619691496		CFL1	-2.244890388	N/A		RHOA	-2.137561955	N/A		AKT3	-2.079390384	N/A
PDGFC	-2.79367619	2.3225923094896954		SKP2	N/A	-4.353833331386971						NFKBIA	2.4057269657595013	-3.5445648515991275						DNAJC4	2.647502497565548	N/A		c-MYC	N/A	-2.5816993694932275		MYL9	N/A	-2.3030114113278857		RPA1	-2.269842937	N/A		HRAS	-2.345025264	N/A
ACTR2	-2.032645394	N/A		CCND1	-5.007760481	N/A						CDH4	-5.327951181	4.005928904907339						PRKCH	2.6354895957457916	N/A		GR	N/A	-2.7149439010801557		CDC42EP2	N/A	-2.3075966933602876		Zeb1	N/A	-2.283506028118858		PIK3R1	2.9216806479302093	-5.653085845387804
ITGA3	-4.80871892	2.7667949162888963		p18INK4C	-2.974390399	-2.7026941799621573						CDH2	-4.672584014	2.6818122336566046						JUND	2.6227851237176942	N/A		PIK3R1	2.9216806479302093	-5.653085845387804		MYL12B	N/A	-2.3517065474694805		PCNA	-2.648729728	N/A		SOCS3	-8.757098611	2.5491473898836867
GNG12	-2.059638218	N/A		SUV39H1	-8.078551834	N/A						AKT3	-2.079390384	N/A						SOD2	2.5165467424907204	N/A		NMI	N/A	-5.2508388682635525		2011-09-01	-2.393846678	N/A		GR	N/A	-2.7149439010801557
ITGB1	-2.065074255	N/A		CCNA2	-5.483726175	-3.594913231909062						MEKK1	N/A	-2.1206666397791056						GAB1	2.506944754094515	N/A		SOCS3	-8.757098611	2.5491473898836867		PFN1	-2.44724405	N/A		Rcc1	-2.920860695	N/A
PAK1	-2.085192127	N/A		CDC25A	-11.18428745	N/A						RHOA	-2.137561955	N/A						DNAJB2	2.422544262154211	N/A						MPRIP	-2.45854616	N/A		Ets1	-3.662613834	N/A
RHOA	-2.137561955	N/A		CDK1	-19.57181908	-5.119423291808494						RASA1	-2.160743928	N/A						GSTA4	2.2626569841961643	N/A						ROCK2	N/A	-2.641656732954464		RFC5	-3.825563822	N/A
RAC2	-2.13770451	N/A		E2F1	-28.03726552	N/A						MYL9	N/A	-2.3030114113278857						CAT	2.182902830944265	N/A						ACTR3	-2.686548393	N/A		RFC4	-6.389268848	N/A
ARPC5L	-2.182006772	N/A		CCNB1	-34.12706857	N/A						HRAS	-2.345025264	N/A						GSTM3	4.173433228984072	-2.011773325328981						2001-09-01	N/A	-2.6933319005444916		ARHGDIB	-5.100262653	-3.336021636140864
CFL1	-2.244890388	N/A		E2F7	-40.32346858	N/A						MYL12B	N/A	-2.3517065474694805						MAPK8	N/A	2.091246791692101						CFL2	-2.827687393	N/A		RFC3	-11.18940825	N/A
TLN2	-2.257069752	N/A		CCNB2	-51.55042927	N/A						ROCK2	N/A	-2.641656732954464						MAPK7	2.028252089140314	N/A						CDC42EP1	-3.327300841	N/A
MYL9	N/A	-2.3030114113278857		CCNE2	-132.9368453	N/A						PIK3R1	2.9216806479302093	-5.653085845387804						EIF2AK3	2.027424923274928	N/A						MSN	-3.693358924	N/A
HRAS	-2.345025264	N/A		E2F8	-259.2268582	N/A						CDH6	-8.75383599	4.703511439735806						ERP29	2.0022368723987354	N/A						ACTG1	-3.775195404	N/A
MYL12B	N/A	-2.3517065474694805		E2F2	-465.262386	N/A						PXN	-4.589901279	N/A						GSTM2	4.288330523833705	-3.0960630403130676						PIP4K2A	-2.058078519	-2.01482967038347
EGF	-2.430860445	N/A										LPAR3	N/A	-9.09343044833821						TXN	3.4451087520385735	-2.531421915007222						ACTB	-2.423180438	-2.293860393090966
PFN1	-2.44724405	N/A																		GSTM4	2.7304163171235207	-2.112949091574551						ACTA2	-2.895497516	-2.082520293868536
ACTN1	-2.449551904	N/A																		DNAJC7	2.354071439791328	-2.0919923297830527						ABL2	-7.907518719	2.414032751549024
MPRIP	-2.45854616	N/A																		GSTK1	2.392541836032259	-2.2582049835307783						ARHGAP6	3.828748956526114	-10.635095394910508
ACTN4	-2.521994478	N/A																		MAFF	-7.83557244	7.947273068407984						LPAR3	N/A	-9.09343044833821
ROCK2	N/A	-2.641656732954464																		NQO1	2.5429786880575764	-2.4345092587193777						EZR	-16.3970715	N/A
MYH9	-2.649093982	N/A																		GCLM	2.003521088078854	-2.0072863181996357						CDC42EP3	N/A	-16.482806647435037
ACTR3	-2.686548393	N/A																		ABCC2	2.8038939820543076	-3.1341206998038698						ACTC1	-20.76780921	N/A
PIK3R1	2.9216806479302093	-5.653085845387804																		HO-1	N/A	-2.0422435950462						NGEF	-21.08018918	N/A
DRF1	-2.769595499	N/A																		MEKK	N/A	-2.1206666397791056						CIT	-33.53141427	-2.3821699103568714
CFL2	-2.827687393	N/A																		STIP1	-2.121697414	N/A						ANLN	-85.05685336	-4.056204032099038
FGF2	-3.030541389	N/A																		HRAS	-2.345025264	N/A
FGF1	-6.348754263	3.191571483367142																		MAP2K3	-2.352439356	N/A
PDGFA	N/A	-3.21328792028846																		PRKCD	N/A	-2.5263338619691496
ITGA4	-3.370465927	N/A																		PIK3R1	2.9216806479302093	-5.653085845387804
MSN	-3.693358924	N/A																		DNAJC9	-3.345487496	N/A
ACTG1	-3.775195404	N/A																		ACTG1	-3.775195404	N/A
PIP4K2A	-2.058078519	-2.01482967038347																		AOX1	N/A	-4.077126374979262
PXN	-4.589901279	N/A																		ACTB	-2.423180438	-2.293860393090966
ACTB	-2.423180438	-2.293860393090966																		ACTA2	-2.895497516	-2.082520293868536
ACTA2	-2.895497516	-2.082520293868536																		FRA1	-12.48695451	3.269034921663647
FN1	-5.831195777	N/A																		DNAJB13	-9.752372135	N/A
FGF5	-8.700857764	N/A																		ACTC1	-20.76780921	N/A
EZR	-16.3970715	N/A
ACTC1	-20.76780921	N/A
DIAPH3	-17.66478766	-3.8362010935863275
IQGAP3	-99.98592263	N/A
note: N/A = the cutoff (fc>2, FDR<0.01 and TPM>2 in one condition of the pairwise comparison) not matched
